# Supplementary material for: Reduction of Graphene Oxide by Laser Scribing in Different Atmospheres and Application in Humidity Sensing
Source: Hindawi journal article supplement (doi:10.1155/2020/4946954), 2020-10-05

**Supplementary material**

Figure S1: RH sensing setup scheme


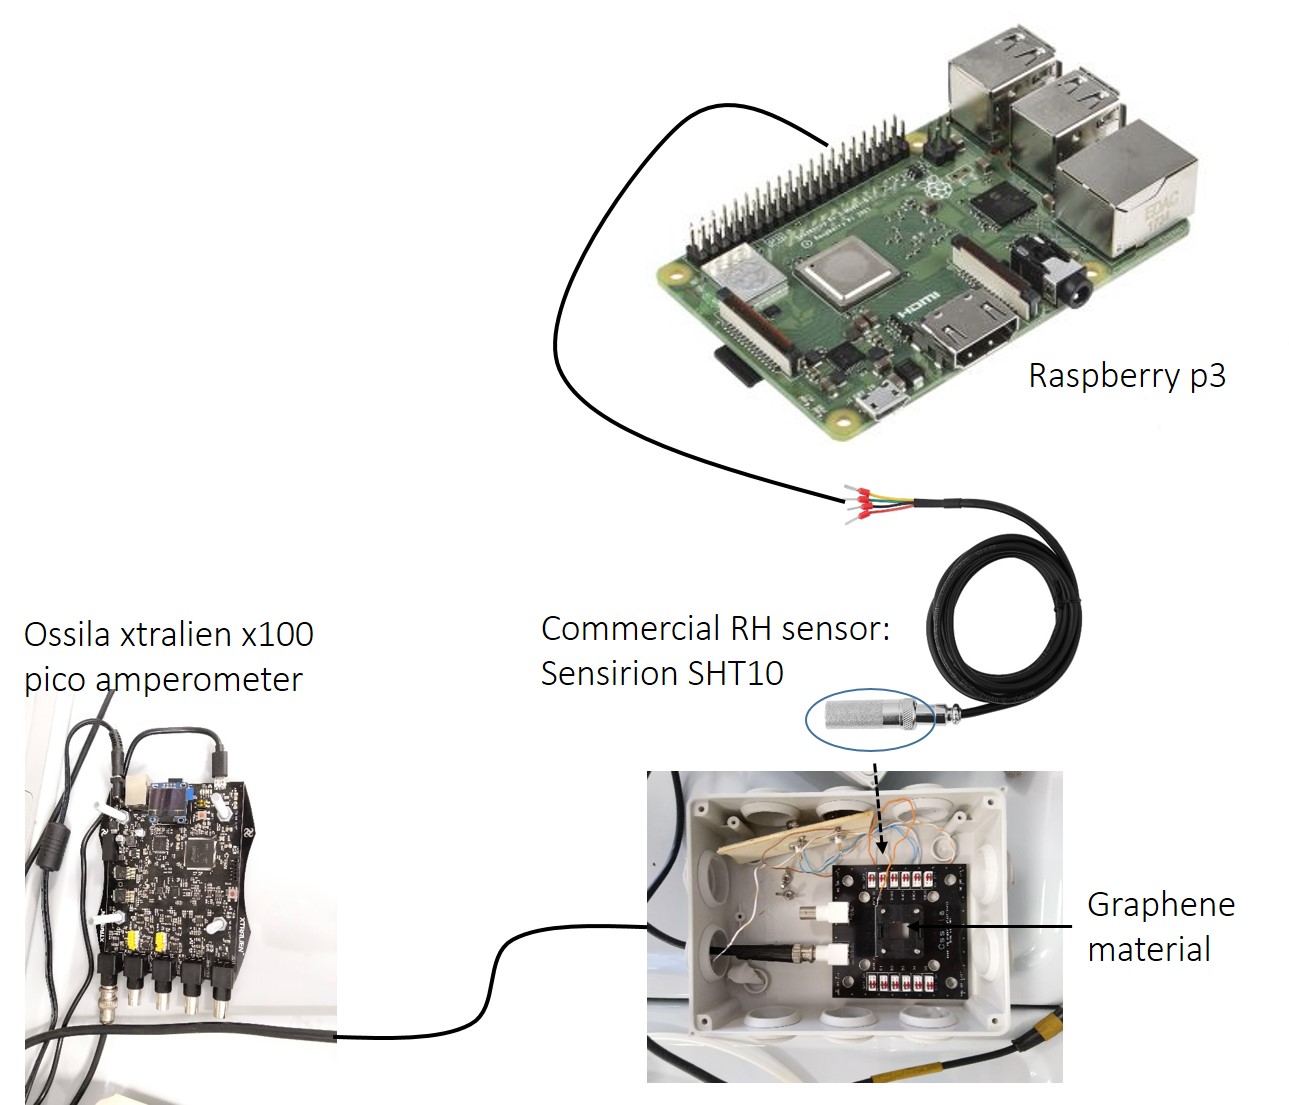


Figure S2. Low magnification SEM images of RGO lines made by laser scribing. Scale bar: 100 μm


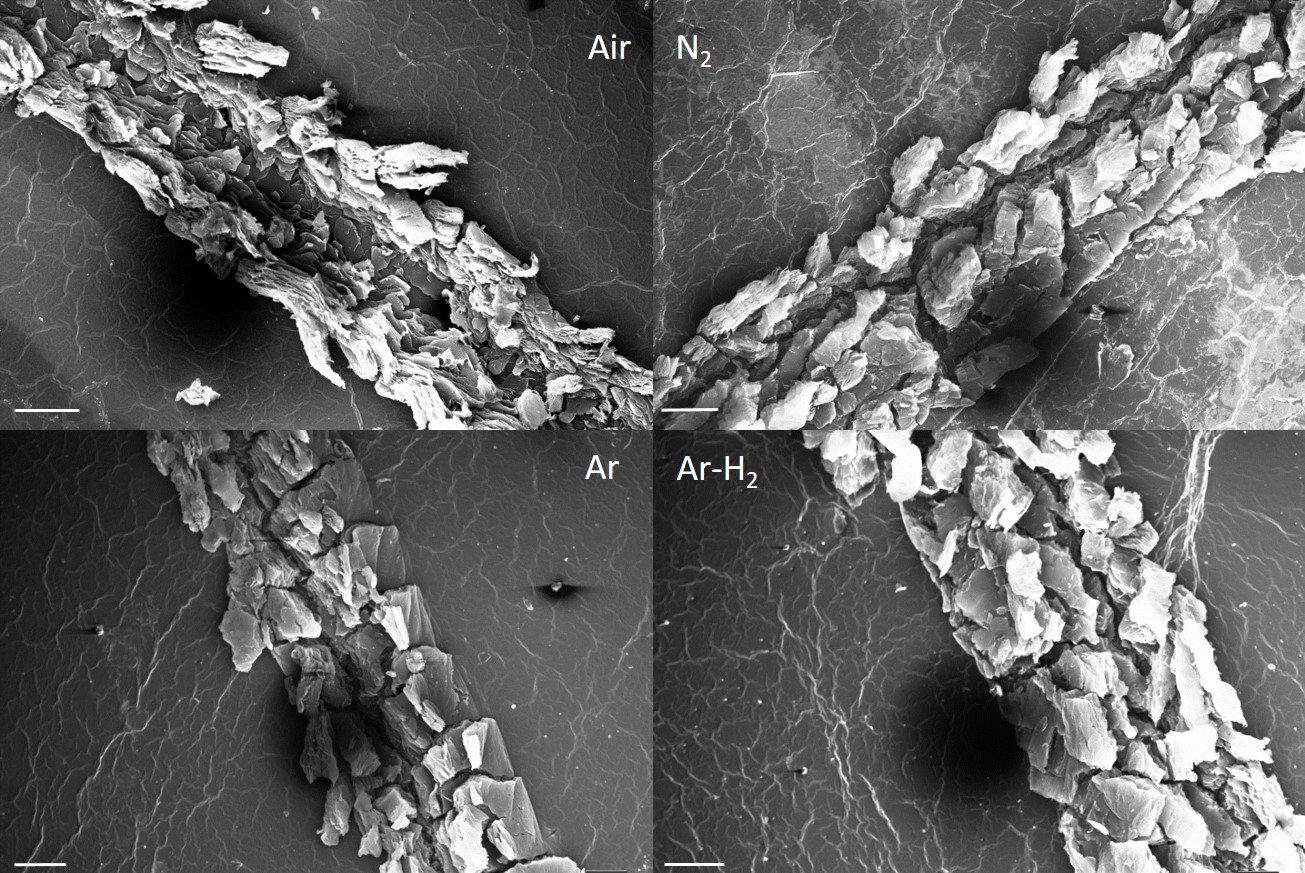


Figure S3: XPS spectra of GO and RGO in Argon atmosphere


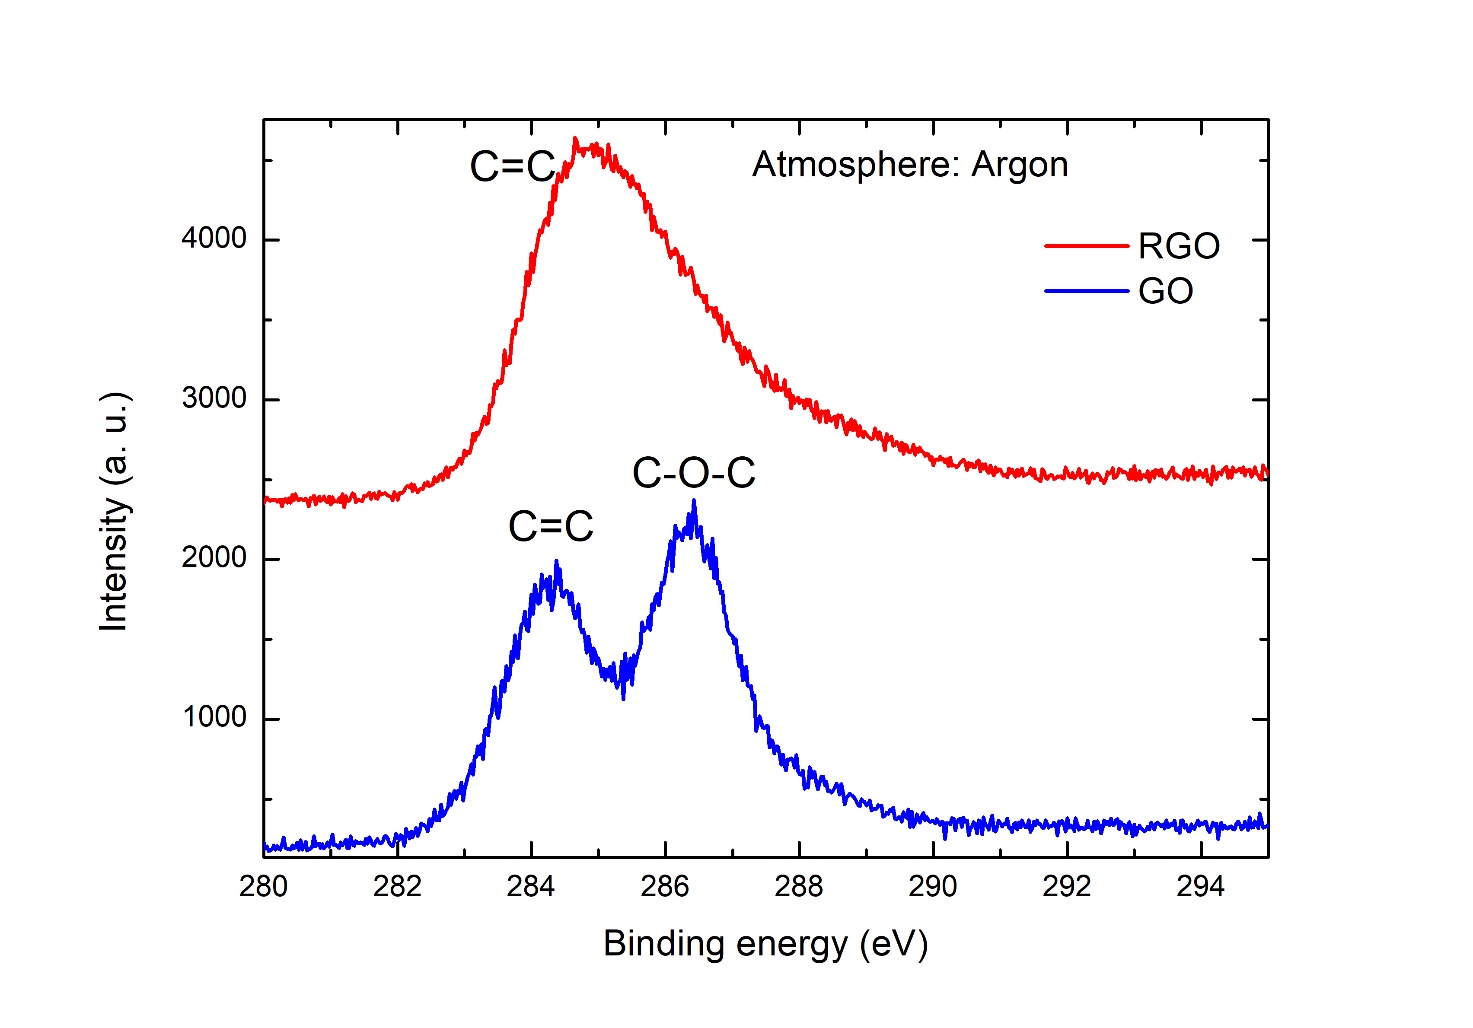


Figure S4: parallel representation of RH measured by a commercial sensor and the response from rGO produced in air


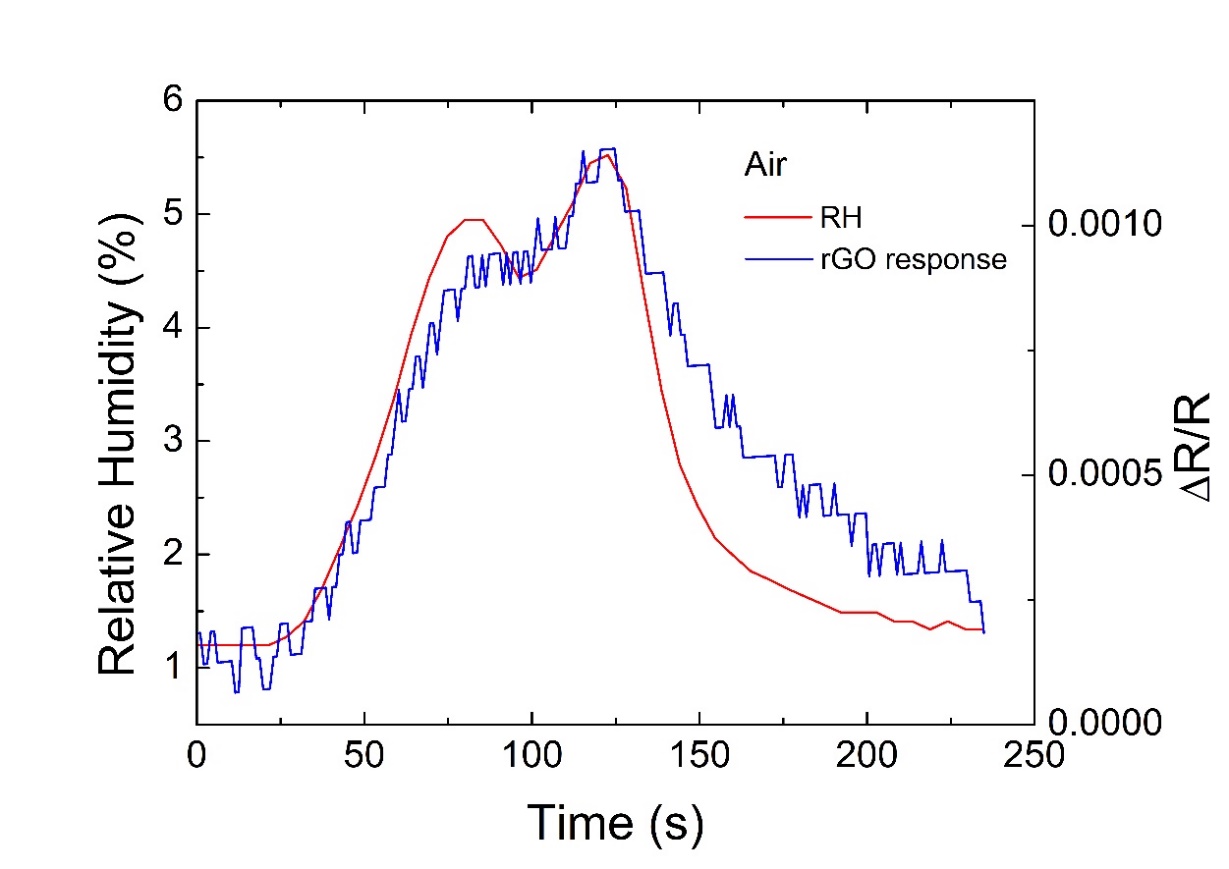


Figure S5: parallel representation of RH measured by a commercial sensor and the response from rGO produced in Nitrogen


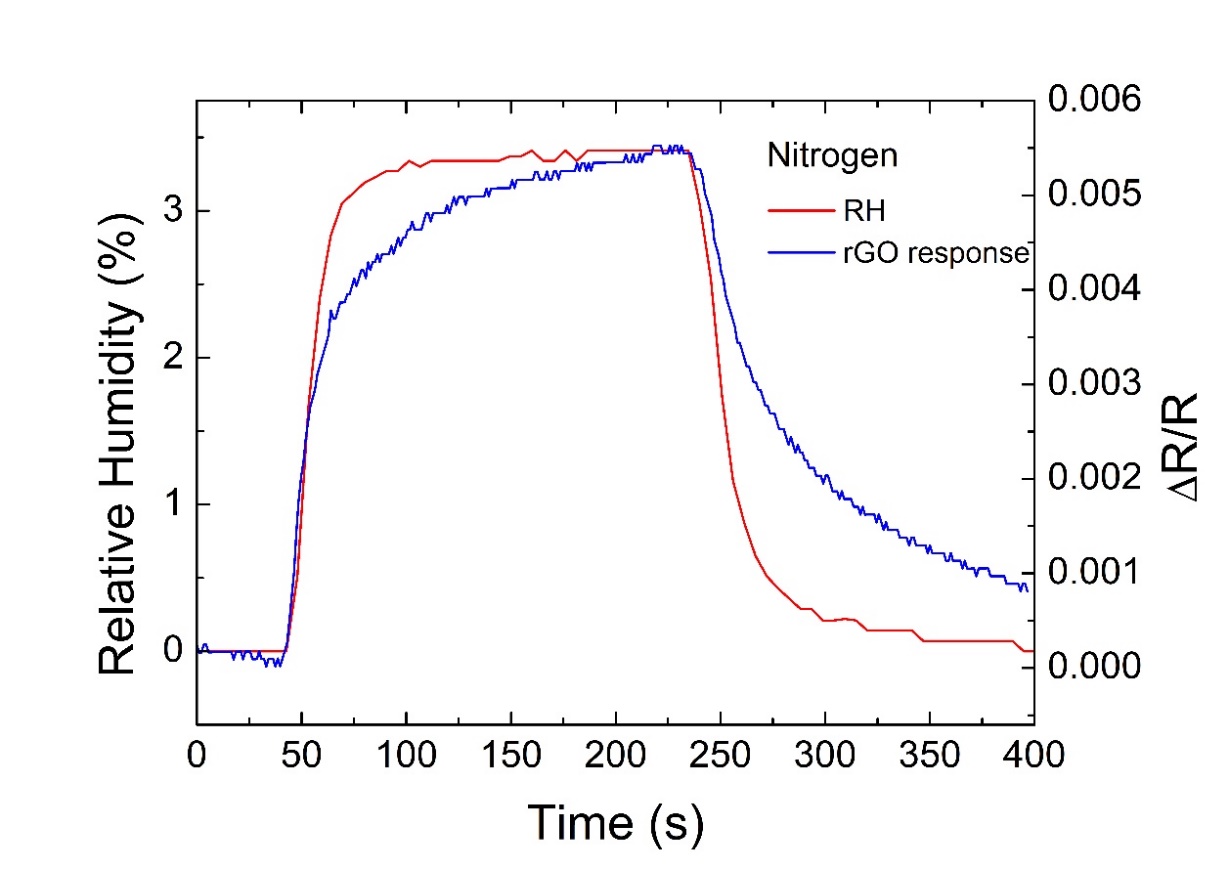


Figure S6: parallel representation of RH measured by a commercial sensor and the response from rGO produced in Ar-H2


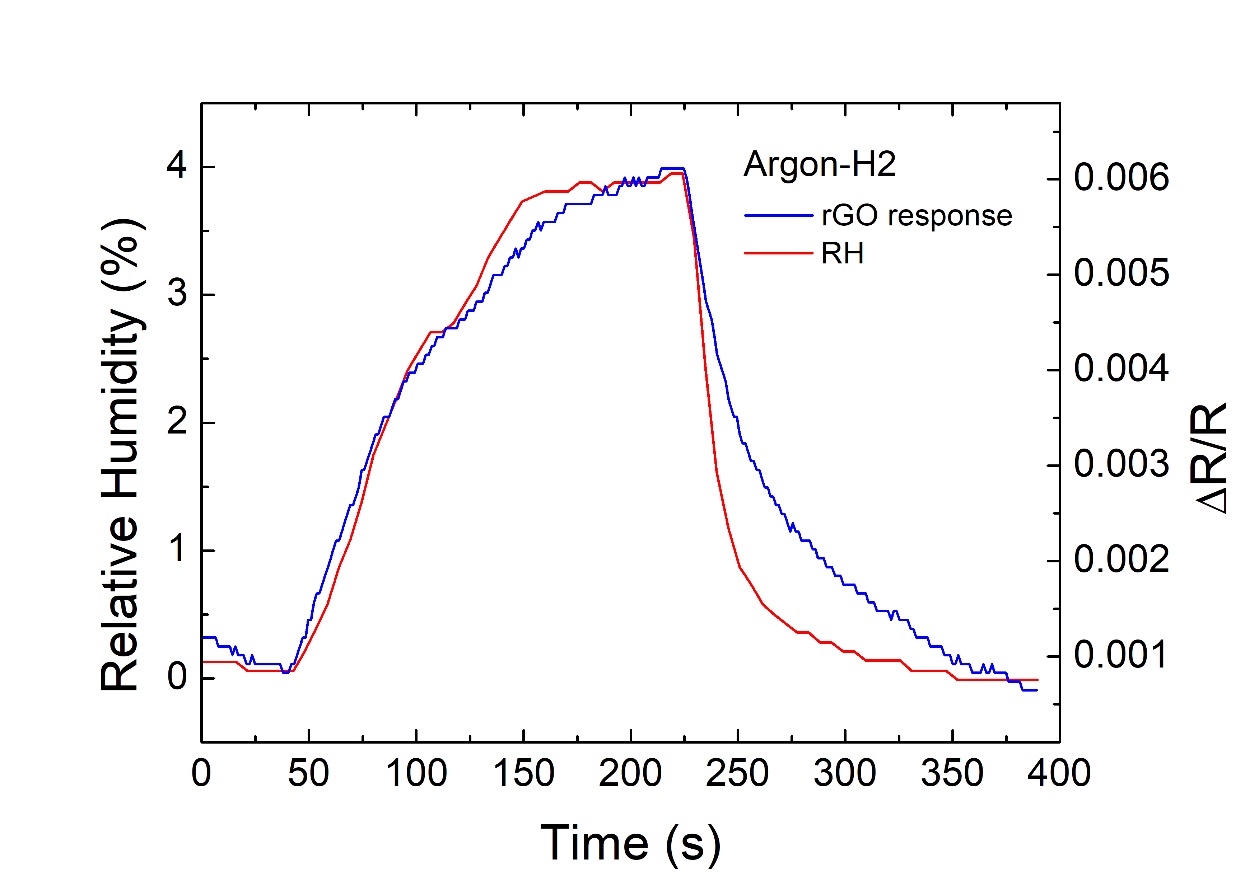

Supplement: f1 [file 4946954.f1.docx]
